# Supplementary material
Source: HighWire-hosted journal article supplement (https://www.cmaj.ca/highwire/filestream/147026/field_highwire_adjunct_files/4/220508-res-5-at.pdf)
Supplement: 220508-res-5-at.pdf [file 220508-res-5-at.pdf]

Appendix C

Characteristics of 258 participating family members

| Characteristics of 258 participating family members |    |    |    |    |    |    |    |    |    |       |
|-----------------------------------------------------|----|----|----|----|----|----|----|----|----|-------|
| Province                                            | BC | AB | SK | MB | ON | QC | NB | NS | NL | TOTAL |
| N                                                   | 78 | 21 | 19 | 25 | 43 | 35 | 11 | 22 | 4  | 258   |
| Sex                                                 |    |    |    |    |    |    |    |    |    |       |
| Male                                                | 21 | 6  | 7  | 3  | 10 | 13 | 3  | 10 | 0  | 73    |
| Female                                              | 57 | 16 | 12 | 22 | 32 | 22 | 8  | 12 | 4  | 185   |
| Relationship to Patient                             |    |    |    |    |    |    |    |    |    |       |
| Parent                                              | 37 | 12 | 12 | 8  | 12 | 10 | 6  | 11 | 4  | 112   |
| Spouse/Partner                                      | 25 | 7  | 3  | 4  | 17 | 11 | 2  | 5  | 0  | 74    |
| Child                                               | 3  | 0  | 1  | 6  | 7  | 11 | 2  | 1  | 0  | 31    |
| Sibling                                             | 12 | 3  | 0  | 5  | 5  | 3  | 0  | 3  | 0  | 31    |
| Other                                               | 1  | 0  | 3  | 2  | 1  | 0  | 1  | 2  | 0  | 10    |

Appendix 5, as supplied by the authors. Appendix to: Sarti AJ, Sutherland S, Meade M, et al. The experiences of family members of deceased organ donors and suggestions to improve the donation process: a qualitative study. *CMAJ* 2022. DOI: 10.1503/cmaj.220508. Copyright © 2022 The Author(s) or their employer(s). To receive this resource in an accessible format, please contact us at [cmajgroup@cmaj.ca](mailto:cmajgroup@cmaj.ca).
